# Supplementary material
Source: MDPI journal article supplement (https://www.mdpi.com/2225-1154/6/3/54)
Supplement: s1 [file s1]

## Supplementary materials

|                                                                                   |           |
|-----------------------------------------------------------------------------------|-----------|
| S1: Data parameters extracted and coded as nodes, cases, and classifications..... | page 1    |
| S5: Publications included in the analysis (n=126) .....                           | page 2-12 |

### S1: Data parameters extracted and coded as nodes, cases, and classifications

**a**

| Nodes |                                  |
|-------|----------------------------------|
| ★     | Name                             |
| [-]   | Adaptation                       |
|       | Constraints                      |
|       | Focal area                       |
|       | Strategies                       |
|       | Type                             |
|       | Exposure                         |
| [-]   | Impacts                          |
|       | Biodiversity                     |
|       | Diseases                         |
|       | Economic                         |
|       | Feeds                            |
|       | Food security                    |
|       | Heat stress                      |
|       | Livestock numbers                |
|       | Performance                      |
|       | Product quality                  |
|       | Reproduction                     |
|       | Water and other natural resource |
|       | Implications                     |
|       | Knowledge gaps                   |
|       | Livestock purpose                |
| [-]   | Production system                |
|       | Description                      |
|       | Research needs                   |

**b**

| Cases |                   |
|-------|-------------------|
| ★     | Name              |
|       | Geoeconomic group |
|       | Geographic area   |
|       | Research method   |
|       | Source of data    |
|       | Species focus     |
|       | Study type        |
|       | Topical focus     |

**c**

| Source Classifications |                |
|------------------------|----------------|
| ★                      | Name           |
| [-]                    | Reference      |
| ★                      | Name           |
|                        | Reference Type |
|                        | Author         |
|                        | Year           |
|                        | Title          |
|                        | Publisher      |
|                        | Type of Work   |

**S2: Publications included in the analysis (n=126)**

| <b>N</b> | <b>Author</b>    | <b>Title</b>                                                                                                     | <b>Year of Publication</b> | <b>Publisher/ Journal</b>                       | <b>Geo-economic Group</b> | <b>Geographic area</b> | <b>Production Systems classification</b> |
|----------|------------------|------------------------------------------------------------------------------------------------------------------|----------------------------|-------------------------------------------------|---------------------------|------------------------|------------------------------------------|
| 1        | Ahmed, et al.    | The impact of climate changes on livestock sector: Challenging experience from bangladesh                        | 2013                       | Asian Journal of Animal and Veterinary Advances | Developing                | Bangladesh             | Not specified                            |
| 2        | Ahmed, et al.    | Climate change concern to cattle feed in Bangladesh                                                              | 2012                       | Journal of Animal and Veterinary Advances       | Developing                | Bangladesh             | Extensive Cattle                         |
| 3        | Alam & Ai-Amin   | The impacts of climate change on animal health and economy: A way forward for policy option                      | 2011                       | Asian Journal of Animal and Veterinary Advances | Developing                | Global                 | Not specified                            |
| 4        | Ayal & Leal      | Farmers' perceptions of climate variability and its adverse impacts on crop and livestock production in Ethiopia | 2017                       | Journal of Arid Environments                    | Developing                | Ethiopia               | Mixed crop-livestock                     |
| 5        | Banik, et al.    | Climate Change: Impacts on Livestock Diversity in Tropical Countries                                             | 2015                       | Livestock Production and Climate Change         | Developing                | Global                 | Tropical area                            |
| 6        | Berhe, et al.    | The effects of adaptation to climate change on income of households in rural Ethiopia                            | 2017                       | Pastoralism-Research Policy and Practice        | Developing                | Ethiopia               | Agropastoral and Mixed                   |
| 7        | Bett, et al.     | Effects of climate change on the occurrence and distribution of livestock diseases                               | 2017                       | Preventive Veterinary Medicine                  | Developing                | East Africa            | Not specified                            |
| 8        | Chauhan, et al.  | Impact of climate change on livestock production: A review                                                       | 2014                       | Journal of Animal Research                      | Developed                 | India                  | Not specified                            |
| 9        | Chingala, et al. | Determinants of smallholder farmers' perceptions of impact of climate change on beef production in Malawi        | 2017                       | Climatic Change                                 | Developing                | Malawi                 | Extensive Cattle                         |

|    |                       |                                                                                                                                                                                                      |      |                                                                                               |            |                    |                                        |
|----|-----------------------|------------------------------------------------------------------------------------------------------------------------------------------------------------------------------------------------------|------|-----------------------------------------------------------------------------------------------|------------|--------------------|----------------------------------------|
| 10 | Clarke, et al.        | Climate change perceptions, drought responses and views on carbon farming amongst commercial livestock and game farmers in the semiarid Great Fish River Valley, Eastern Cape province, South Africa | 2012 | African Journal of Range & Forage Science                                                     | Developing | South Africa       | Semi-arid and Arid Areas               |
| 11 | Cohen, et al.         | Evaluation of the effects of climate change on forage and livestock production and assessment of adaptation strategies on the Canadian prairies                                                      | 2002 | A Report to The Prairie Adaptation Research Collaborative Canadian Climate Change Action Fund | Developed  | Canada             | Pasture/Grazing based                  |
| 12 | Cooper, et al.        | Potential impacts of climate change on veterinary medicinal residues in livestock produce: An island of Ireland perspective                                                                          | 2015 | Trends in Food Science and Technology                                                         | Developed  | Ireland            | Not specified                          |
| 13 | Cox, et al.           | A Survey-Based Assessment of Cattle Producers' Adaptation to Climate Change in British Columbia, Canada                                                                                              | 2015 | Rangeland Ecology & Management                                                                | Developed  | Canada             | Ranching                               |
| 14 | Craine, et al.        | Climate change and cattle nutritional stress                                                                                                                                                         | 2010 | Global Change Biology                                                                         | Developed  | United States      | Intensive Pasture                      |
| 15 | Crimp, et al.         | Managing Murray-Darling Basin livestock systems in a variable and changing climate: Challenges and opportunities                                                                                     | 2010 | Rangeland Journal                                                                             | Developed  | Australia          | Rangeland                              |
| 16 | Das, et al.           | Impact of heat stress on health and performance of dairy animals: A review                                                                                                                           | 2016 | Veterinary World                                                                              | Developed  | Global             | Not specified                          |
| 17 | Debela, et al.        | Perception of climate change and its impact by smallholders in pastoral/agropastoral systems of Borana, South Ethiopia                                                                               | 2015 | Springerplus                                                                                  | Developing | Ethiopia           | Agro-pastoralism                       |
| 18 | Derner, et al.        | Vulnerability of grazing and confined livestock in the Northern Great Plains to projected mid- and late-twenty-first century climate                                                                 | 2017 | Climatic Change                                                                               | Developed  | United States      | grazing and confined livestock systems |
| 19 | Descheemaeker, et al. | Climate change adaptation and mitigation in smallholder crop–livestock systems in sub-Saharan Africa: a call for integrated impact assessments                                                       | 2016 | Regional Environmental Change                                                                 | Developing | Sub-saharan Africa | Mixed crop-livestock                   |
| 20 | Descheemaeker, et al. | Effects of climate change and adaptation on the livestock component of mixed farming systems: A modelling study from semi-arid Zimbabwe                                                              | 2016 | Agricultural Systems                                                                          | Developing | Zimbabwe           | Mixed crop-livestock                   |

|    |                           |                                                                                                                                                        |      |                                                                     |            |                |                         |
|----|---------------------------|--------------------------------------------------------------------------------------------------------------------------------------------------------|------|---------------------------------------------------------------------|------------|----------------|-------------------------|
| 21 | Fang, et al.              | Frozen soil change and adaptation of animal husbandry: A case of the source regions of Yangtze and Yellow Rivers                                       | 2011 | Environmental Science and Policy                                    | Developed  | China          | Agropastoral            |
| 22 | Feleke, et al.            | Determinants of adaptation choices to climate change by sheep and goat farmers in Northern Ethiopia: the case of Southern and Central Tigray, Ethiopia | 2016 | Springerplus                                                        | Developing | Ethiopia       | Extensive               |
| 23 | Forman, et al.            | Climate change impacts and risks for animal health in Asia                                                                                             | 2008 | Revue Scientifique Et Technique-Office International Des Epizooties | Developing | Asia           | Extensive-smallholders  |
| 24 | Franzluebbers             | Climate change and integrated crop-livestock systems in temperate-humid regions of north and South America: Mitigation and adaptation                  | 2014 | Climate Change Impact and Adaptation in Agricultural Systems        | Developing | South America  | Mixed crop-livestock    |
| 25 | Gale, et al.              | The effect of climate change on the occurrence and prevalence of livestock diseases in Great Britain: a review                                         | 2009 | Journal of Applied Microbiology                                     | Developed  | United Kingdom | Not specified           |
| 26 | Galvin, et al.            | Climate variability and impacts on east African livestock herders: The Maasai of Ngorongoro Conservation Area, Tanzania                                | 2004 | African Journal of Range and Forage Science                         | Developing | Tanzania       | Pastoral system         |
| 27 | Gaughan & Cawdell-Smith   | Impact of climate change on livestock production and reproduction                                                                                      | 2015 | Climate Change Impact on Livestock: Adaptation and Mitigation       | Global     | Global         | Not specified           |
| 28 | Gethings, et al.          | Asynchrony in host and parasite phenology may decrease disease risk in livestock under climate warming: Nematodirus battus in lambs as a case study    | 2015 | Parasitology                                                        | Developed  | United Kingdom | Small ruminants/Pasture |
| 29 | Ghahramani & Moore        | Climate change and broadacre livestock production across southern Australia. 2. Adaptation options via grassland management                            | 2013 | Crop & Pasture Science                                              | Developed  | Australia      | Broadacre/rangelands    |
| 30 | Gilbert, et al.           | Climate change and avian influenza                                                                                                                     | 2008 | Revue Scientifique Et Technique-Office International Des Epizooties | Global     | Global         | Intensive Poultry       |
| 31 | Giridhar & Samireddypalle | Impact of climate change on forage availability for livestock                                                                                          | 2015 | Climate Change Impact on Livestock: Adaptation and Mitigation       | Global     | Global         | Grazing                 |

|    |                  |                                                                                                                                                                   |      |                                                                     |            |                |                          |
|----|------------------|-------------------------------------------------------------------------------------------------------------------------------------------------------------------|------|---------------------------------------------------------------------|------------|----------------|--------------------------|
| 32 | Godber, et al.   | Livestock and food security: vulnerability to population growth and climate change                                                                                | 2014 | Global Change Biology                                               | Global     | Global         | Not specified            |
| 33 | Hall & Wreford   | Adaptation to climate change: The attitudes of stakeholders in the livestock industry                                                                             | 2012 | Mitigation and Adaptation Strategies for Global Change              | Developed  | United Kingdom | Not specified            |
| 34 | Hansen           | Heat Stress and Climate Change                                                                                                                                    | 2011 | Comprehensive Biotechnology, Second Edition                         | Developed  | Global         | Not specific             |
| 35 | Harrison, et al. | Management options for dairy farms under climate change: Effects of intensification, adaptation and simplification on pastures, milk production and profitability | 2017 | Agricultural Systems                                                | Developed  | Australia      | Intensive-Pasture based  |
| 36 | Henry, et al.    | Livestock production in a changing climate: adaptation and mitigation research in Australia                                                                       | 2012 | Crop & Pasture Science                                              | Developed  | Australia      | Extensive grazing system |
| 37 | Herrero, et al.  | Climate change and pastoralism: Impacts, consequences and adaptation                                                                                              | 2016 | Revue Scientifique Et Technique-Office International Des Epizooties | Global     | Global         | Pastoral system          |
| 38 | Herrero, et al.  | Livestock and the Environment: What Have We Learned in the Past Decade?                                                                                           | 2015 | Annual Review of Environment and Resources                          | Global     | Global         | Not specified            |
| 39 | Hoffmann         | Climate change and the characterization, breeding and conservation of animal genetic resources                                                                    | 2010 | Animal Genetics                                                     | Global     | Global         | Not specified            |
| 40 | Hou              | Adaptation of mixed crop-livestock systems in Asia                                                                                                                | 2014 | Climate Change Impact and Adaptation in Agricultural Systems        | Developing | Asia           | Mixed crop-livestock     |
| 41 | Hou, et al.      | The perception and adaptation of herdsmen to climate change and climate variability in the desert steppe region of northern China                                 | 2012 | Rangeland Journal                                                   | Developed  | China          | Pastoral system          |
| 42 | Howden, et al.   | Climate change and Australian livestock systems: Impacts, research and policy issues                                                                              | 2008 | Australian Journal of Experimental Agriculture                      | Developed  | Australia      | Sector-wide              |
| 43 | Hristov, et al.  | Climate change effects on livestock in the Northeast US and strategies for adaptation                                                                             | 2017 | Climatic Change                                                     | Developed  | United States  | Sector-wide              |

|    |                             |                                                                                                                                                                          |      |                                                                  |            |               |                         |
|----|-----------------------------|--------------------------------------------------------------------------------------------------------------------------------------------------------------------------|------|------------------------------------------------------------------|------------|---------------|-------------------------|
| 44 | Huho & Ngaira               | Pastoralism and the changing climate in the arid northern Kenya                                                                                                          | 2011 | Livestock: Rearing, Farming Practices and Diseases               | Developing | Kenya         | Pastoralism             |
| 45 | Johannesen, et al.          | Livestock management at northern latitudes: Potential economic effects of climate change in sheep farming: Potential economic effects of climate change in sheep farming | 2013 | Ecological Economics                                             | Developed  | Norway        | Grazing                 |
| 46 | Joshi,et al.                | Herders' perceptions of and responses to climate change in Northern Pakistan                                                                                             | 2013 | Environmental Management                                         | Developing | Pakistan      | Agro-pastoralism        |
| 47 | Kabubo-Mariara              | Climate change adaptation and livestock activity choices in Kenya: An economic analysis                                                                                  | 2008 | Natural Resources Forum                                          | Developing | Kenya         | Extensive               |
| 48 | J. Kabubo-Mariara           | Global warming and livestock husbandry in Kenya: Impacts and adaptations                                                                                                 | 2009 | Ecological Economics                                             | Developing | Kenya         | Mixed crop livestock    |
| 49 | Kachergis, et al.           | Increasing flexibility in rangeland management during drought                                                                                                            | 2014 | Ecosphere                                                        | Developed  | United States | Rangelands              |
| 50 | Kadzere, et al.             | Heat stress in lactating dairy cows: A review                                                                                                                            | 2002 | Livestock Production Science                                     | Developed  | United States | Pasture/Grazing based   |
| 51 | Key & Sneeringer            | Potential Effects of Climate Change on the Productivity of U.S. Dairies                                                                                                  | 2014 | American Journal of Agricultural Economics                       | Developed  | United States | Rangelands              |
| 52 | Kimaro & Chibinga           | Potential impact of climate change on livestock production and health in East Africa: A review                                                                           | 2013 | Livestock Research for Rural Development                         | Developing | East Africa   | Sector-wide             |
| 53 | Koluman Darcan & Silanikove | The advantages of goats for future adaptation to Climate Change: A conceptual overview                                                                                   | 2017 | Small Ruminant Research                                          | Developing | Global        | Extensive               |
| 54 | Kuczynski, et al.           | Impact of global climate change on the health, welfare and productivity of intensively housed livestock                                                                  | 2011 | International Journal of Agricultural and Biological Engineering | Global     | Global        | Intensive-Confined      |
| 55 | Lia,et al.                  | Econometric analysis of the impacts of climate change on the livestock production in qinghai province                                                                    | 2013 | Chinese Journal of Population Resources and Environment          | Developed  | China         | Grazing-Grassland based |
| 56 | Lin, et al.                 | Strategies for preventing heat stress in poultry                                                                                                                         | 2006 | World's Poultry Science Journal                                  | Global     | Global        | Not specified           |

|    |                     |                                                                                                                                                                |      |                                          |            |               |                       |
|----|---------------------|----------------------------------------------------------------------------------------------------------------------------------------------------------------|------|------------------------------------------|------------|---------------|-----------------------|
| 57 | Liu, et al.         | Herdsmen's Adaptation to Climate Changes and Subsequent Impacts in the Ecologically Fragile Zone, China                                                        | 2013 | Advances in Meteorology                  | Developed  | China         | Pastoral system       |
| 58 | Liu, et al.         | Heat Stress in Dairy Cattle Alters Lipid Composition of Milk                                                                                                   | 2017 | Scientific Reports                       | Developed  | Australia     | Not specified         |
| 59 | Mader, et al.       | Potential climate change effects on warm-season livestock production in the Great Plains                                                                       | 2009 | Climatic Change                          | Developed  | United States | Intensive confined    |
| 60 | Maiti, et al.       | Adapting to climate change: Traditional coping mechanism followed by the Brokpa pastoral nomads of Arunachal Pradesh, India                                    | 2014 | Indian Journal of Traditional Knowledge  | Developing | India         | Pastoral system       |
| 61 | Maiti, et al.       | Climate change awareness among the livestock rearers of east coast of India                                                                                    | 2016 | Indian Journal of Animal Sciences        | Developed  | India         | Extensive             |
| 62 | Marshall, et al.    | Vulnerability of the livestock industry in eastern Australia                                                                                                   | 2017 | Sustainability Science                   | Developed  | Australia     | Pasture/Grazing based |
| 63 | Martin & Magne      | Agricultural diversity to increase adaptive capacity and reduce vulnerability of livestock systems against weather variability - A farm-scale simulation study | 2015 | Agriculture Ecosystems & Environment     | Developed  | France        | Sector-wide           |
| 64 | Martin, et al.      | How much climate change can pastoral livelihoods tolerate? Modelling rangeland use and evaluating risk                                                         | 2014 | Global Environmental Change              | Developing | Morocco       | Pastoral system       |
| 65 | Martinsohn & Hansen | The Impact of Climate Change on the Economics of Dairy Farming - a Review and Evaluation                                                                       | 2012 | German Journal of Agricultural Economics | Developed  | Global        | Intensive             |
| 66 | McKeon, et al.      | Climate change impacts on northern Australian rangeland livestock carrying capacity: a review of issues                                                        | 2009 | Rangeland Journal                        | Developed  | Australia     | Rangeland             |
| 67 | Megersa, et al.     | Impacts of climate change and variability on cattle production in southern Ethiopia: Perceptions and empirical evidence                                        | 2014 | Agricultural Systems                     | Developing | Ethiopia      | Pastoral system       |
| 68 | Megersa, et al.     | Livestock Diversification: an Adaptive Strategy to Climate and Rangeland Ecosystem Changes in Southern Ethiopia                                                | 2014 | Human Ecology                            | Developing | Ethiopia      | Pastoral system       |

|    |                    |                                                                                                                                                                                      |      |                                                                   |            |                    |                      |
|----|--------------------|--------------------------------------------------------------------------------------------------------------------------------------------------------------------------------------|------|-------------------------------------------------------------------|------------|--------------------|----------------------|
| 69 | Moore & Ghahramani | Climate change and broadacre livestock production across southern Australia. 3. Adaptation options via livestock genetic improvement                                                 | 2014 | Animal Production Science                                         | Developed  | Australia          | Rangelands           |
| 70 | Mu, et al.         | Adaptation to climate change: changes in farmland use and stocking rate in the U.S                                                                                                   | 2013 | Mitigation and Adaptation Strategies for Global Change            | Developed  | United States      | Rangeland            |
| 71 | Muchuru & Nhamo    | Climate change and the African livestock sector: Emerging adaptation measures from UNFCCC national communications                                                                    | 2017 | International Journal of Climate Change Strategies and Management | Developing | Africa             | Sector-wide          |
| 72 | Ness               | Tibetan nomads facing an uncertain future: Impacts of climate change on the Qinghai-Tibetan Plateau                                                                                  | 2012 | Community, Environment and Disaster Risk Management               | Developing | Tibet              | Pastoral system      |
| 73 | Nardone, et al.    | Effects of climate changes on animal production and sustainability of livestock systems                                                                                              | 2010 | Livestock Science                                                 | Global     | Global             | Sector-wide          |
| 74 | Naskar, et al.     | Strategies to improve livestock genetic resources to counter climate change impact                                                                                                   | 2015 | Climate Change Impact on Livestock: Adaptation and Mitigation     | Global     | Global             | Sector-wide          |
| 75 | Notenbaert, et al. | Targeting, out-scaling and prioritising climate-smart interventions in agricultural systems: Lessons from applying a generic framework to the livestock sector in sub-Saharan Africa | 2017 | Agricultural Systems                                              | Developing | Sub-saharan Africa | Mixed crop-livestock |
| 76 | Opiyo, et al.      | Determinants of perceptions of climate change and adaptation among Turkana pastoralists in northwestern Kenya                                                                        | 2016 | Climate and Development                                           | Developing | Kenya              | Pastoral system      |
| 77 | Ou & Mendelsohn    | An analysis of climate adaptation by livestock farmers in the Asian tropics                                                                                                          | 2017 | Climate Change Economics                                          | Developing | Asia               | Sector-wide          |
| 78 | Oyekale            | Impacts of climate change on livestock husbandry and adaptation options in the arid sahel belt of West Africa: Evidence from a baseline survey                                       | 2014 | Asian Journal of Animal and Veterinary Advances                   | Developing | West Africa        | Sector-wide          |
| 79 | Özkan, et al.      | Challenges and priorities for modelling livestock health and pathogens in the context of climate change                                                                              | 2016 | Environmental Research                                            | Developed  | Europe             | Sector-wide          |



|    |                       |                                                                                                                                                                       |      |                                                                  |            |                |                       |
|----|-----------------------|-----------------------------------------------------------------------------------------------------------------------------------------------------------------------|------|------------------------------------------------------------------|------------|----------------|-----------------------|
| 80 | Panthi, et al.        | Livelihood vulnerability approach to assessing climate change impacts on mixed agro-livestock smallholders around the Gandaki River Basin in Nepal                    | 2016 | Regional Environmental Change                                    | Developing | Nepal          | Mixed crop-livestock  |
| 81 | Part, et al.          | Prevalence rates of health and welfare conditions in broiler chickens change with weather in a temperate climate                                                      | 2016 | Royal Society Open Science                                       | Developed  | United Kingdom | Intensive/confined    |
| 82 | Poudel                | Factors associated with farm-level variation, and farmers' perception and climate change adaptation in smallholder mixed-farming livestock production system in Nepal | 2015 | International Journal of Environment and Sustainable Development | Developing | Nepal          | Mixed crop-livestock  |
| 83 | Prasad & Sejian       | Climate change impact on livestock sector: Visioning 2025                                                                                                             | 2015 | Climate Change Impact on Livestock: Adaptation and Mitigation    | Developing | Global         | Sector-wide           |
| 84 | Punsalmaa, et al.     | Adaptation measures to climate change in the Mongolian livestock sector                                                                                               | 2013 | Climate Adaptation Futures                                       | Developing | Mongolia       | Pastoral system       |
| 85 | Reeves, et al.        | Potential Climate Change Impacts on Four Biophysical Indicators of Cattle Production from Western US Rangelands                                                       | 2017 | Rangeland Ecology & Management                                   | Developed  | United States  | Rangelands            |
| 86 | Renaudeau, et al.     | Adaptation to hot climate and strategies to alleviate heat stress in livestock production                                                                             | 2012 | Animal                                                           | Developing | Global         | Sector-wide           |
| 87 | Reynolds, et al.      | Livestock and climate change impacts in the developing world                                                                                                          | 2010 | Outlook on Agriculture                                           | Developing | Global         | Sector-wide           |
| 88 | Rojas-Downing, et al. | Pasture diversification to combat climate change impacts on grazing dairy production                                                                                  | 2017 | Mitigation and Adaptation Strategies for Global Change           | Developed  | United States  | Pasture/Grazing based |
| 89 | Rojas-Downing, et al. | Climate change and livestock: Impacts, adaptation, and mitigation                                                                                                     | 2017 | Climate Risk Management                                          | Global     | Global         | Sector-wide           |
| 90 | Rust & Rust           | Climate change and livestock production: A review with emphasis on Africa                                                                                             | 2013 | South African Journal of Animal Sciences                         | Developing | Africa         | Mixed crop-livestock  |
| 91 | Salama, et al.        | Different levels of response to heat stress in dairy goats                                                                                                            | 2014 | Small Ruminant Research                                          | Global     | Global         | Not specified         |

|     |                    |                                                                                                                                                                                       |      |                                                               |            |               |                       |
|-----|--------------------|---------------------------------------------------------------------------------------------------------------------------------------------------------------------------------------|------|---------------------------------------------------------------|------------|---------------|-----------------------|
| 92  | Sautier, et al.    | Use of productivity-defined indicators to assess exposure of grassland-based livestock systems to climate change and variability                                                      | 2013 | Crop & Pasture Science                                        | Developed  | France        | Pasture/Grazing based |
| 93  | Sautier, et al.    | Assessing climatic exposure of grassland-based livestock systems with seasonal-scale indicators                                                                                       | 2013 | Climatic Change                                               | Developed  | France        | Pasture/Grazing based |
| 94  | Sejian, et al.     | Introduction to concepts of climate change impact on livestock and its adaptation and mitigation                                                                                      | 2015 | Climate Change Impact on Livestock: Adaptation and Mitigation | Global     | Global        | Sector-wide           |
| 95  | Seo                | Untold Tales of Goats in Deadly Indian Monsoons: Adapt or Rain-Retreat under Global Warming?                                                                                          | 2016 | Journal of Extreme Events                                     | Developed  | India         | Extensive             |
| 96  | Seo & Mendelsohn   | Measuring impacts and adaptations to climate change: A structural Ricardian model of African livestock management                                                                     | 2008 | Agricultural Economics                                        | Developed  | Africa        | Extensive             |
| 97  | Seo, et al.        | Adapting to Climate Change Mosaically: An Analysis of African Livestock Management by Agro-Ecological Zones                                                                           | 2009 | The B.E. Journal of Economic Analysis & Policy                | Developing | Africa        | Sector-wide           |
| 98  | Seo, et al.        | From beef cattle to sheep under global warming? An analysis of adaptation by livestock species choice in South America                                                                | 2010 | Ecological Economics                                          | Developing | South America | Sector-wide           |
| 99  | Shikuku, et al.    | Prioritizing climate-smart livestock technologies in rural Tanzania: A minimum data approach                                                                                          | 2017 | Agricultural Systems                                          | Developing | Tanzania      | Mixed crop-livestock  |
| 100 | Silanikove         | The physiological basis of adaptation in goats to harsh environments                                                                                                                  | 2000 | Small Ruminant Research                                       | Developing | Global        | Extensive             |
| 101 | Silanikove & Nazan | Impact of climate change on the dairy industry in temperate zones: Predications on the overall negative impact and on the positive role of dairy goats in adaptation to earth warming | 2015 | Small Ruminant Research                                       | Developed  | Europe        | Temperate zone        |
| 102 | Singh, et al.      | Evaluation of Indian sheep breeds of arid zone under heat stress condition                                                                                                            | 2016 | Small Ruminant Research                                       | Developed  | India         | Arid Zone             |
| 103 | Skuce, et al.      | Animal health aspects of adaptation to climate change: beating the heat and parasites in a warming Europe                                                                             | 2013 | Animal: an international journal of animal bioscience         | Developed  | Europe        | Intensive             |
| 104 | Soussana, et al.   | Improving the use of modelling for projections of climate change impacts on crops and pastures                                                                                        | 2010 | Journal of Experimental Botany                                | Developed  | Europe        | Pasture/Grazing based |

|     |                      |                                                                                                                                                        |      |                                                                   |            |                                   |                      |
|-----|----------------------|--------------------------------------------------------------------------------------------------------------------------------------------------------|------|-------------------------------------------------------------------|------------|-----------------------------------|----------------------|
| 105 | Speranza             | Drought Coping and Adaptation Strategies: Understanding Adaptations to Climate Change in Agro-pastoral Livestock Production in Makueni District, Kenya | 2010 | European Journal of Development Research                          | Developing | Kenya                             | Agro-pastoralism     |
| 106 | Thamo, et al.        | Climate change impacts and farm-level adaptation: Economic analysis of a mixed cropping–livestock system                                               | 2017 | Agricultural Systems                                              | Developed  | Australia                         | Mixed crop-livestock |
| 107 | Thornton, et al.     | Vulnerability, climate change and livestock-research opportunities and challenges for poverty alleviation                                              | 2007 | Journal of SAT Agricultural Research                              | Developing | Global                            | Sector-wide          |
| 108 | Thornton & Gerber    | Climate change and the growth of the livestock sector in developing countries                                                                          | 2010 | Mitigation and Adaptation Strategies for Global Change            | Developing | Global                            | Sector-wide          |
| 109 | Thornton & Herrero   | Climate change adaptation in mixed crop - livestock systems in developing countries                                                                    | 2014 | Global Food Security-Agriculture Policy Economics and Environment | Developing | Sub-saharan Africa and South Asia | Mixed crop-livestock |
| 110 | Thornton & Herrero   | Adapting to climate change in the mixed crop and livestock farming systems in sub-Saharan Africa                                                       | 2015 | Nature Climate Change                                             | Developing | Sub-saharan Africa                | Mixed crop livestock |
| 111 | Thornton, et al.     | The impacts of climate change on livestock and livestock systems in developing countries: A review of what we know and what we need to know            | 2009 | Agricultural Systems                                              | Developing | Global                            | Sector-wide          |
| 112 | Tibbo & van de Steeg | Climate change adaptation and mitigation options for the livestock sector in the near east and North Africa                                            | 2013 | Climate Change and Food Security in West Asia and North Africa    | Developing | North Africa                      | Mixed crop-livestock |
| 113 | Tilahun, et al.      | Community-based knowledge towards rangeland condition, climate change, and adaptation strategies: the case of Afar pastoralists                        | 2017 | Ecological Processes                                              | Developing | Ethiopia                          | Pastoral system      |
| 114 | Treydte, et al.      | Rangeland forage availability and management in times of drought – A case study of pastoralists in Afar, Ethiopia                                      | 2017 | Journal of Arid Environments                                      | Developing | Ethiopia                          | Pastoral system      |

|     |                    |                                                                                                                                                                                           |      |                                                        |            |                |                          |
|-----|--------------------|-------------------------------------------------------------------------------------------------------------------------------------------------------------------------------------------|------|--------------------------------------------------------|------------|----------------|--------------------------|
| 115 | Van Dijk, et al.   | Climate change and infectious disease: Helminthological challenges to farmed ruminants in temperate regions                                                                               | 2010 | Animal                                                 | Developed  | United Kingdom | Intensive/Temperate      |
| 116 | Verschave, et al.  | Cattle and Nematodes Under Global Change: Transmission Models as an Ally                                                                                                                  | 2016 | Trends in Parasitology                                 | Developed  | Global         | Intensive                |
| 117 | Wako, et al.       | Camel management as an adaptive strategy to climate change by pastoralists in southern Ethiopia                                                                                           | 2017 | Ecological Processes                                   | Developing | Ethiopia       | Pastoral system          |
| 118 | Weindl, et al.     | Livestock in a changing climate: Production system transitions as an adaptation strategy for agriculture                                                                                  | 2015 | Environmental Research Letters                         | Global     | Global         | Sector-wide              |
| 119 | West, J. W.        | Effects of heat-stress on production in dairy cattle                                                                                                                                      | 2003 | Journal of Dairy Science                               | Developed  | United states  | Intensive                |
| 120 | Wheeler & Reynolds | Predicting the risks from climate change to forage and crop production for animal feed                                                                                                    | 2013 | Animal frontiers                                       | Developed  | Global         | Sector-wide              |
| 121 | White, et al.      | The vulnerability of the Australian beef industry to impacts of the cattle tick (Boophilus microplus) under climate change                                                                | 2003 | Climatic Change                                        | Developed  | Australia      | Rangeland                |
| 122 | Wilkes, et al.     | Is cross-breeding with indigenous sheep breeds an option for climate-smart agriculture?                                                                                                   | 2017 | Small Ruminant Research                                | Developing | Mongolia       | Extensive                |
| 123 | Wolfe, et al.      | Projected change in climate thresholds in the Northeastern U.S.: Implications for crops, pests, livestock, and farmers                                                                    | 2008 | Mitigation and Adaptation Strategies for Global Change | Developed  | United States  | Mixed crop-livestock     |
| 124 | Wu                 | The response of the distributions of Asian buffalo breeds in China to climate change over the past 50 years                                                                               | 2015 | Livestock Science                                      | Developed  | China          | Extensive                |
| 125 | Zhang, et al.      | Adaptation of herders to droughts and privatization of rangeland-use rights in the arid Alxa Left Banner of Inner Mongolia                                                                | 2013 | Journal of Environmental Management                    | Developing | Mongolia       | Semi-arid and Arid Areas |
| 126 | Zougmore, et al.   | Toward climate-smart agriculture in West Africa: A review of climate change impacts, adaptation strategies and policy developments for the livestock, fishery and crop production sectors | 2016 | Agriculture and Food Security                          | Developing | West Africa    | Mixed crop-livestock     |
